# Supplementary material
Source: MDPI journal article supplement (https://www.mdpi.com/2311-5629/8/4/69)
Supplement: s1 [file s1]

## Supplementary materials

In the **Figure S1** the size distributions of NDS in acetone measured using DLS method are presented for different times after the initial ultrasonication.

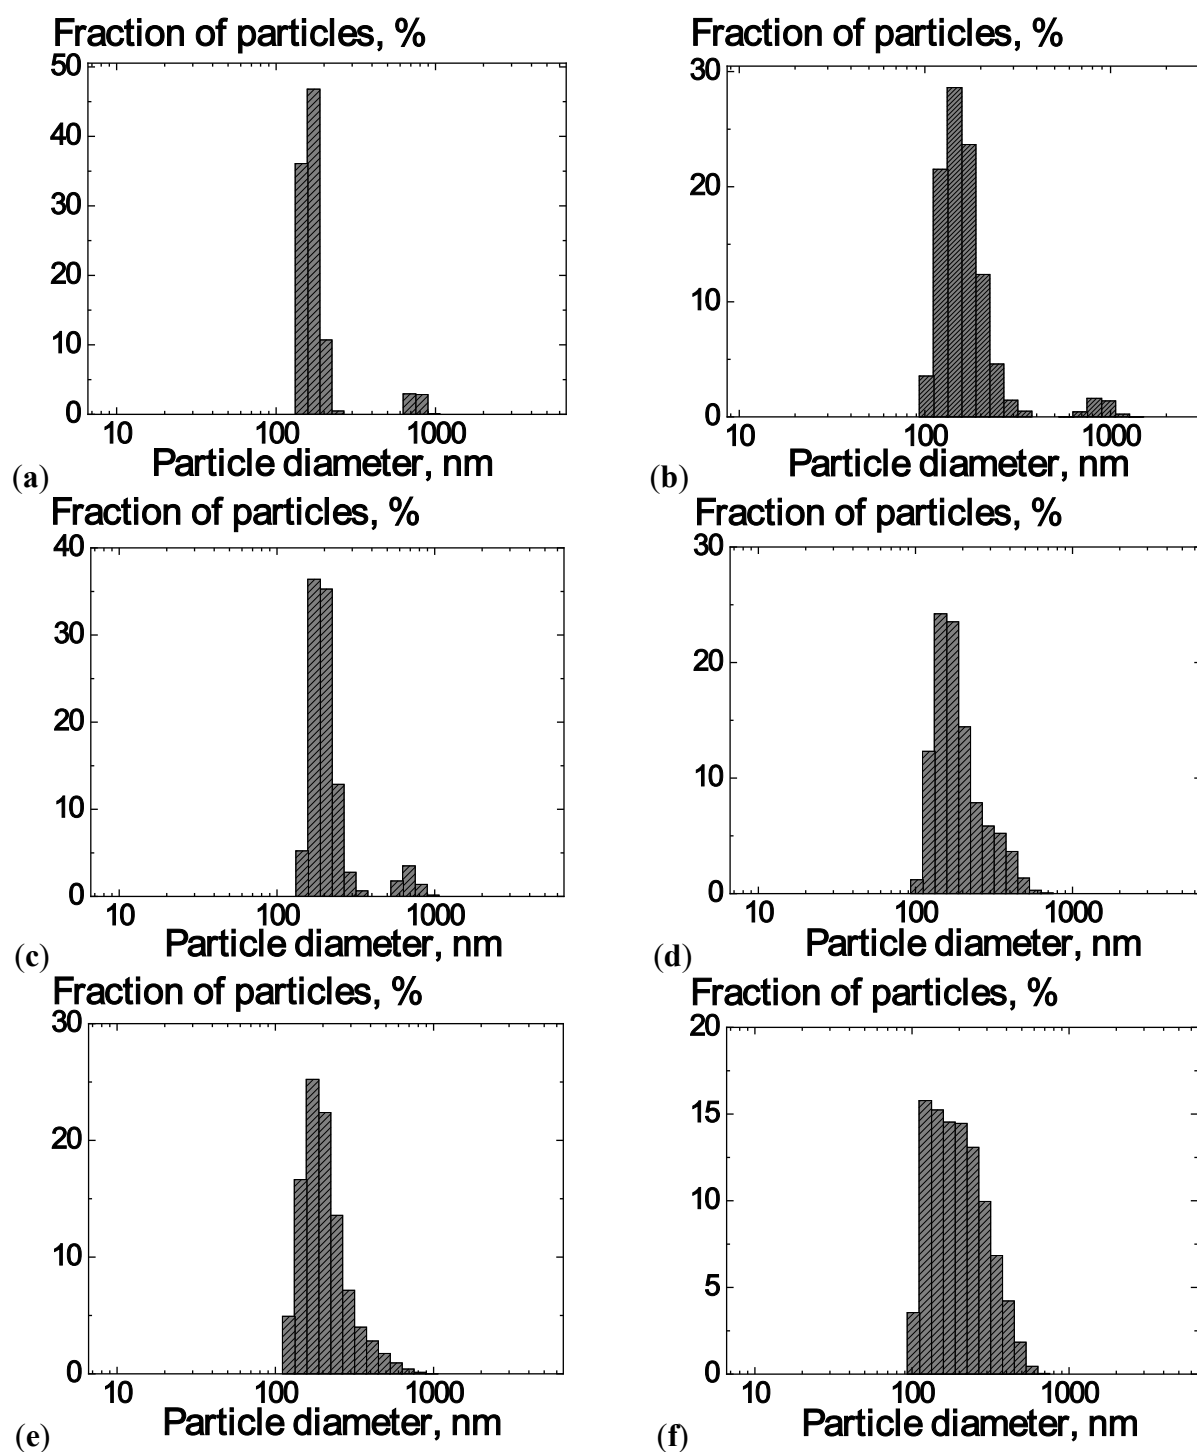

**Figure S1.** Size distributions of NDS in acetone measured using DLS method for different times after the initial ultrasonication: (a) – immediately after ultrasonication; (b) – 24 h after ultrasonication; (c) – 120 h after ultrasonication; (d) - 1 week after ultrasonication; (e) - 3 weeks after ultrasonication; (f) - 4 weeks after ultrasonication;

In the **Figure S2** the size distributions of NDS in DMSO measured using DLS method are presented for different times after the initial ultrasonication.

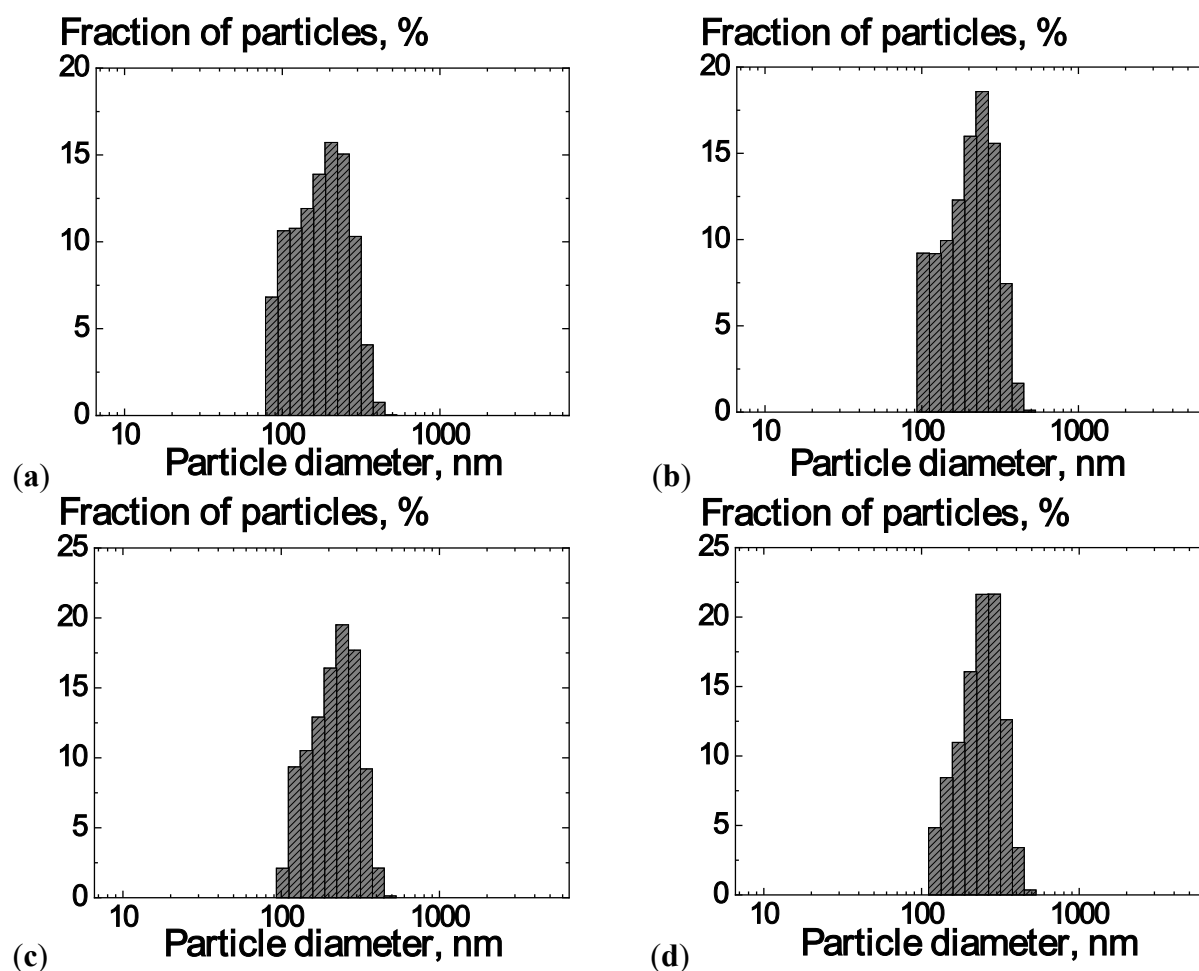

**Figure S2.** Size distributions of NDS in DMSO measured using DLS method for different times after the initial ultrasonication: **(a)** – immediately after ultrasonication; **(b)** – 24 h after ultrasonication; **(c)** – 120 h after ultrasonication; **(d)** - 1 week after ultrasonication.

In the **Figure S3** the size distributions of NDS in ethanol measured using DLS method are presented for different times after the initial ultrasonication.

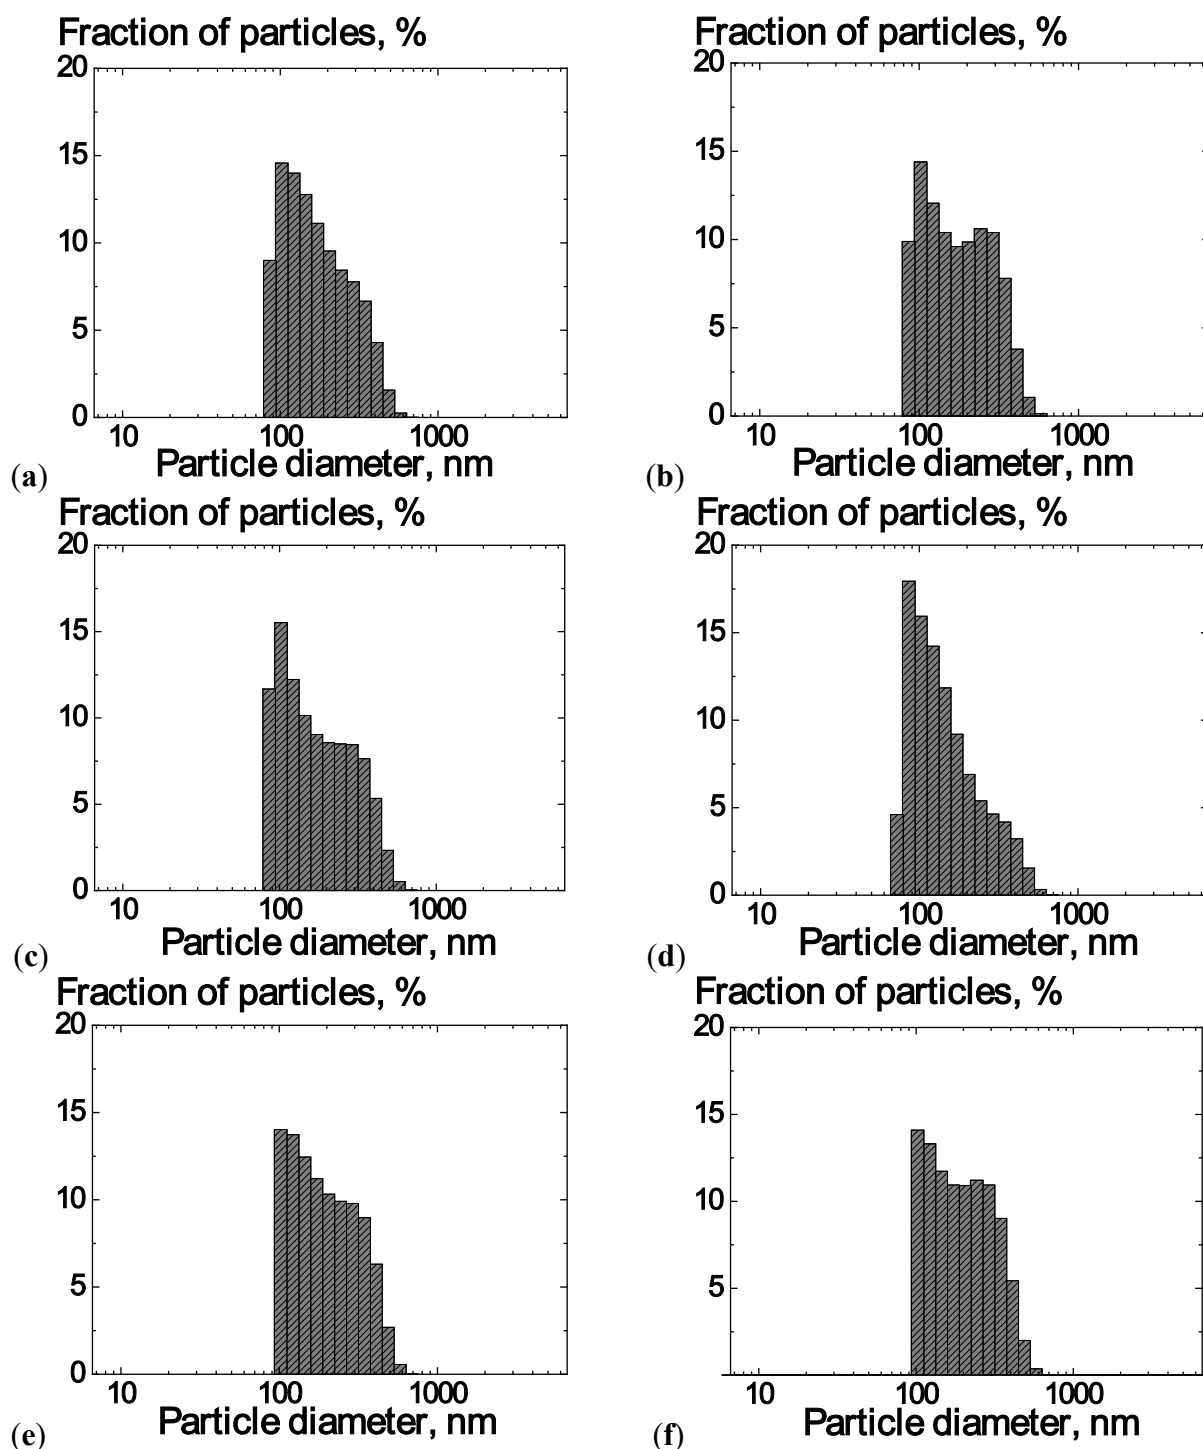

**Figure S3.** Size distributions of NDS in ethanol measured using DLS method for different times after the initial ultrasonication: (a) – immediately after ultrasonication; (b) – 24 h after ultrasonication; (c) – 120 h after ultrasonication; (d) - 1 week after ultrasonication; (e) - 3 weeks after ultrasonication; (f) - 4 weeks after ultrasonication;

In the **Figure S4** the size distributions of NDS in isopropanol measured using DLS method are presented for different times after the initial ultrasonication.

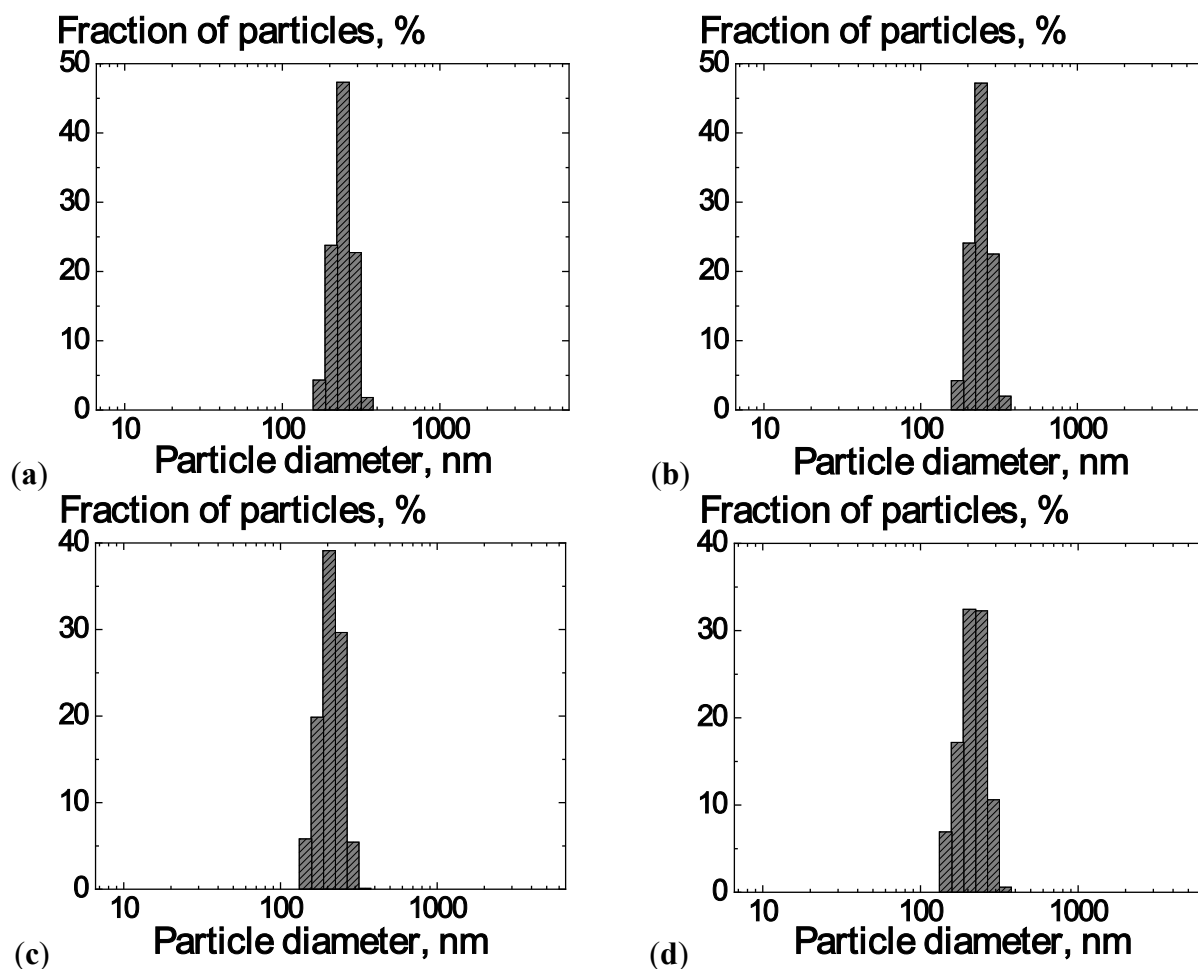

**Figure S4.** Size distributions of NDS in isopropanol measured using DLS method for different times after the initial ultrasonication: **(a)** – immediately after ultrasonication; **(b)** – 24 h after ultrasonication; **(c)** – 120 h after ultrasonication; **(d)** - 1 week after ultrasonication.

In the Figure S5 the photograph of the NDS dispersion in acetone after one year is presented.

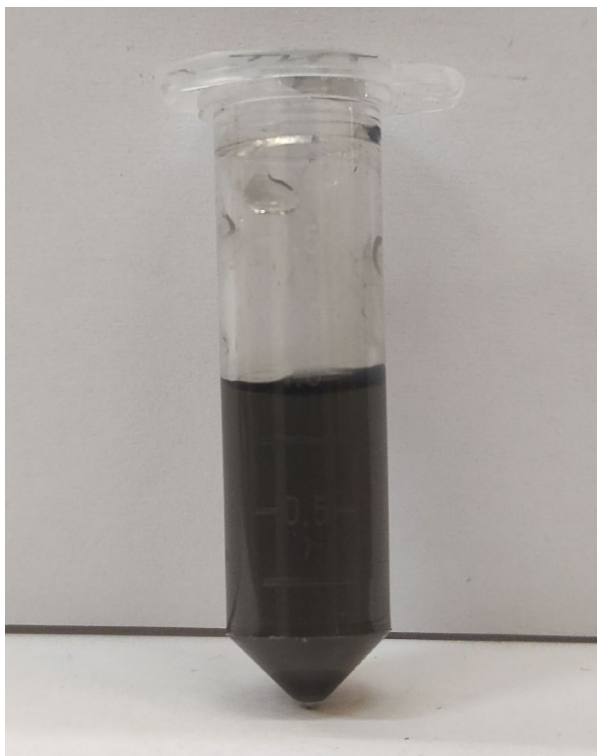

**Figure S5.** Photograph of the NDS dispersion in acetone after one year.
